# Supplementary material for: Prescribing Patterns and Variations of Antibiotic Use for Children in Ambulatory Care: A Nationwide Study
Source: MDPI journal article supplement (doi:10.3390/antibiotics11020189), 2022-01-31
Supplement: s1 [file s1]

## Supplementary Materials

**Table S1.** Top ten antibacterial agents among paediatric age groups in Hungary, 2017

| Age groups     | ATC code | Active substances                 | Prescriptions/<br>100 children/ year | Percentage<br>(%) | Cumulative<br>percentage (%) |
|----------------|----------|-----------------------------------|--------------------------------------|-------------------|------------------------------|
| 0-19<br>years  | J01CR02  | Amoxicillin and clavulanic acid   | 33.36                                | 30.81             | 30.81                        |
|                | J01FA10  | Azithromycin                      | 15.23                                | 14.07             | 44.88                        |
|                | J01DC02  | Cefuroxime                        | 11.90                                | 10.99             | 55.87                        |
|                | J01CA04  | Amoxicillin                       | 9.61                                 | 8.88              | 64.75                        |
|                | J01DC10  | Cefprozil                         | 8.24                                 | 7.61              | 72.36                        |
|                | J01DD08  | Cefixime                          | 6.36                                 | 5.87              | 78.23                        |
|                | J01FA09  | Clarithromycin                    | 5.51                                 | 5.09              | 83.32                        |
|                | J01CE02  | Phenoxymethylpenicillin           | 4.34                                 | 4.01              | 87.32                        |
|                | J01EE01  | Sulfamethoxazole and trimethoprim | 4.05                                 | 3.74              | 91.07                        |
|                | J01DC04  | Cefaclor                          | 3.18                                 | 2.93              | 94.00                        |
| Total          |          |                                   | 108.28                               | 100.00            |                              |
| 0-4<br>years   | J01CR02  | Amoxicillin and clavulanic acid   | 59.83                                | 32.54             | 32.54                        |
|                | J01FA10  | Azithromycin                      | 25.21                                | 13.71             | 46.25                        |
|                | J01CA04  | Amoxicillin                       | 17.76                                | 9.66              | 55.90                        |
|                | J01DD08  | Cefixime                          | 17.08                                | 9.29              | 65.19                        |
|                | J01DC10  | Cefprozil                         | 14.34                                | 7.80              | 72.99                        |
|                | J01DC02  | Cefuroxime                        | 12.46                                | 6.77              | 79.76                        |
|                | J01DC04  | Cefaclor                          | 9.74                                 | 5.30              | 85.06                        |
|                | J01FA09  | Clarithromycin                    | 8.09                                 | 4.40              | 89.46                        |
|                | J01CE02  | Phenoxymethylpenicillin           | 6.73                                 | 3.66              | 93.12                        |
|                | J01EE01  | Sulfamethoxazole and trimethoprim | 6.40                                 | 3.48              | 96.60                        |
| Total          |          |                                   | 183.90                               | 100.00            |                              |
| 5-9<br>years   | J01CR02  | Amoxicillin and clavulanic acid   | 36.68                                | 34.01             | 34.01                        |
|                | J01FA10  | Azithromycin                      | 14.14                                | 13.11             | 47.12                        |
|                | J01DC02  | Cefuroxime                        | 13.53                                | 12.55             | 59.67                        |
|                | J01DC10  | Cefprozil                         | 9.73                                 | 9.02              | 68.69                        |
|                | J01CA04  | Amoxicillin                       | 8.39                                 | 7.78              | 76.46                        |
|                | J01CE02  | Phenoxymethylpenicillin           | 5.74                                 | 5.32              | 81.78                        |
|                | J01DD08  | Cefixime                          | 5.63                                 | 5.22              | 87.01                        |
|                | J01FA09  | Clarithromycin                    | 5.17                                 | 4.79              | 91.80                        |
|                | J01EE01  | Sulfamethoxazole and trimethoprim | 4.08                                 | 3.78              | 95.58                        |
|                | J01DC04  | Cefaclor                          | 2.41                                 | 2.24              | 97.82                        |
| Total          |          |                                   | 107.85                               | 100.00            |                              |
| 10-14<br>years | J01CR02  | Amoxicillin and clavulanic acid   | 18.08                                | 25.78             | 25.78                        |
|                | J01DC02  | Cefuroxime                        | 12.07                                | 17.21             | 42.99                        |
|                | J01FA10  | Azithromycin                      | 10.54                                | 15.03             | 58.02                        |
|                | J01CA04  | Amoxicillin                       | 7.38                                 | 10.51             | 68.53                        |
|                | J01DC10  | Cefprozil                         | 5.44                                 | 7.76              | 76.29                        |
|                | J01FA09  | Clarithromycin                    | 4.70                                 | 6.70              | 83.00                        |
|                | J01CE02  | Phenoxymethylpenicillin           | 3.09                                 | 4.41              | 87.40                        |
|                | J01EE01  | Sulfamethoxazole and trimethoprim | 3.05                                 | 4.35              | 91.75                        |
|                | J01DD08  | Cefixime                          | 1.63                                 | 2.32              | 94.07                        |
|                | J01FF01  | Clindamycin                       | 1.11                                 | 1.58              | 95.65                        |
| Total          |          |                                   | 70.15                                | 100.00            |                              |
| 14-19<br>years | J01CR02  | Amoxicillin and clavulanic acid   | 20.44                                | 27.08             | 27.08                        |
|                | J01FA10  | Azithromycin                      | 11.56                                | 15.32             | 42.40                        |
|                | J01DC02  | Cefuroxime                        | 9.65                                 | 12.78             | 55.18                        |
|                | J01CA04  | Amoxicillin                       | 5.37                                 | 7.12              | 62.30                        |
|                | J01FA09  | Clarithromycin                    | 4.23                                 | 5.60              | 67.90                        |
|                | J01DC10  | Cefprozil                         | 3.85                                 | 5.11              | 73.01                        |
|                | J01FF01  | Clindamycin                       | 3.21                                 | 4.26              | 77.27                        |
|                | J01MA02  | Ciprofloxacin                     | 2.87                                 | 3.80              | 81.07                        |
|                | J01EE01  | Sulfamethoxazole and trimethoprim | 2.82                                 | 3.73              | 84.80                        |
|                | J01MA12  | Levofloxacin                      | 2.55                                 | 3.37              | 88.17                        |
| Total          |          |                                   | 75.49                                | 100.00            |                              |
